# Supplementary material for: Graphyne and graphdiyne: theoretical insight into ground and excited state properties
Source: Royal Society of Chemistry journal article supplement (doi:10.1039/c6ra21155k), 2016-01-01
Supplement: c6ra21155k1.pdf [file c6ra21155k1.pdf]

**Supporting Information**

**Graphyne and Graphdiyne: Theoretical insight into ground and excited state properties**

Siddheshwar Chopra\*

\*Department of Physics, AIAS, Amity University, Noida

\*Corresponding author. E-mail address: [schopra1@amity.edu](mailto:schopra1@amity.edu) (Siddheshwar Chopra)

**Ground state optimized coordinates of gr1 and gr2 structures**

**Gr1:**

C 6.0 -2.2240741960 2.1478985302 0.6554256856  
C 6.0 -3.6394840079 2.1435941110 0.4928361356  
C 6.0 -4.3384427059 0.9082166450 0.3697865375  
C 6.0 -3.6177026546 -0.3207563405 0.3684582901  
C 6.0 -2.2022924461 -0.3164517628 0.5310442865  
C 6.0 -1.5033340786 0.9189255826 0.6540971584  
C 6.0 1.0167166942 7.8831470838 1.2819353880  
C 6.0 -6.9814271173 7.8547568055 0.4441886167  
C 6.0 -10.9185118180 0.8854237179 -0.3305509805  
C 6.0 -6.8584962671 -6.0560054909 -0.2580316266  
C 6.0 1.1396454246 -6.0276168705 0.5797440584  
C 6.0 5.0767387098 0.9417198583 1.3543997386  
C 6.0 2.4370383308 7.8993736426 1.4319308159  
C 6.0 3.1056745664 9.1295174093 1.5653279517  
C 6.0 2.3983990637 10.3288532896 1.5526249263  
C 6.0 1.0135866629 10.3289102921 1.4073644344  
C 6.0 0.3051834797 9.1215642933 1.2709692646  
C 6.0 -6.2918281919 9.0981244768 0.5804484352  
C 6.0 -7.0215317630 10.3003889183 0.5657373489  
C 6.0 -8.4062604702 10.2905446493 0.4200135689  
C 6.0 -9.0922929139 9.0863032332 0.2859660435  
C 6.0 -8.4019505556 7.8609615122 0.2953597388  
C 6.0 -11.6492600632 2.1125749874 -0.3441398074  
C 6.0 -13.0476039615 2.0847037409 -0.4923964958  
C 6.0 -13.7250325587 0.8755247279 -0.6257499981

C 6.0 -13.0262824453 -0.3288092545 -0.6141731754  
C 6.0 -11.6275328216 -0.3468140132 -0.4682348645  
C 6.0 -8.2788200037 -6.0722337826 -0.4080071676  
C 6.0 -8.9474529406 -7.3023766030 -0.5414297316  
C 6.0 -8.2401714443 -8.5017095084 -0.5287776357  
C 6.0 -6.8553568713 -8.5017647292 -0.3835379530  
C 6.0 -6.1469576129 -7.2944199778 -0.2471114237  
C 6.0 0.4500402797 -7.2709873251 0.4435413700  
C 6.0 1.1797335827 -8.4732567886 0.4583480115  
C 6.0 2.5644582884 -8.4634147860 0.6041098232  
C 6.0 3.2504973758 -7.2591703561 0.7380963798  
C 6.0 2.5601652811 -6.0338235905 0.7286069577  
C 6.0 5.8074948182 -0.2854275089 1.3679186391  
C 6.0 7.2058446041 -0.2575528011 1.5161193063  
C 6.0 7.8832705810 0.9516254658 1.6494928729  
C 6.0 7.1845120740 2.1559552809 1.6379910773  
C 6.0 5.7857571965 2.1739568682 1.4921029103  
H 1.0 4.1847811194 9.1262988470 1.6784719333  
H 1.0 2.9300528226 11.2699297872 1.6567838543  
H 1.0 0.4597234516 11.2618714276 1.3972111255  
H 1.0 -6.4841953430 11.2372032609 0.6702928413  
H 1.0 -8.9545192748 11.2278047055 0.4107185947  
H 1.0 -10.1712783973 9.0754703385 0.1721416491  
H 1.0 -13.5893854166 3.0247482613 -0.5009391275  
H 1.0 -14.8049451959 0.8717165154 -0.7393441196  
H 1.0 -13.5514212866 -1.2726204452 -0.7177716246  
H 1.0 -10.0265615075 -7.2991596566 -0.6545547164  
H 1.0 -8.7718222979 -9.4427851165 -0.6329593922

|   |     |               |               |               |
|---|-----|---------------|---------------|---------------|
| H | 1.0 | -6.3014890083 | -9.4347235285 | -0.3734236264 |
| H | 1.0 | 0.6423923976  | -9.4100732261 | 0.3538359156  |
| H | 1.0 | 3.1127088707  | -9.4006788832 | 0.6134806452  |
| H | 1.0 | 4.3294802019  | -7.2483388860 | 0.8519461097  |
| H | 1.0 | 7.7476326086  | -1.1975940599 | 1.5246043532  |
| H | 1.0 | 8.9631876389  | 0.9554363546  | 1.7630448709  |
| H | 1.0 | 7.7096484953  | 3.0997657339  | 1.7416084151  |
| C | 6.0 | -1.1036677144 | 9.1367216689  | 1.1243043624  |
| C | 6.0 | -2.3190876656 | 9.1537129438  | 0.9983133079  |
| C | 6.0 | -3.6682861905 | 9.1489110084  | 0.8572562481  |
| C | 6.0 | -4.8833305456 | 9.1232713583  | 0.7291227476  |
| C | 6.0 | -4.3517729862 | 3.3588222587  | 0.4912446707  |
| C | 6.0 | -4.9691707605 | 4.4148836471  | 0.4780302478  |
| C | 6.0 | -5.6521029296 | 5.5820998356  | 0.4675167575  |
| C | 6.0 | -6.2696931457 | 6.6379602682  | 0.4565774154  |
| C | 6.0 | 0.3265361645  | 6.6614279369  | 1.1464175980  |
| C | 6.0 | -0.2723591027 | 5.6013185415  | 1.0286431051  |
| C | 6.0 | -0.9346200869 | 4.4292391824  | 0.9000324837  |
| C | 6.0 | -1.5333203433 | 3.3691595770  | 0.7799937718  |
| C | 6.0 | 5.0879600101  | 3.4066677348  | 1.4818199217  |
| C | 6.0 | 4.4893997169  | 4.4720581811  | 1.4730722167  |
| C | 6.0 | 3.8045586711  | 5.6429955784  | 1.4606062274  |
| C | 6.0 | 3.1694394816  | 6.6869516871  | 1.4469164630  |
| C | 6.0 | 3.6747258031  | 0.9367577457  | 1.2072706452  |
| C | 6.0 | 2.4581312128  | 0.9324438003  | 1.0797650105  |
| C | 6.0 | 1.1133058591  | 0.9277576997  | 0.9372090650  |
| C | 6.0 | -0.1036204491 | 0.9233289366  | 0.8119481131  |
| C | 6.0 | 0.4279173381  | -4.8108174703 | 0.5673009071  |

C 6.0 -0.1896698797 -3.7549554324 0.5563473329  
C 6.0 -0.8726019437 -2.5877392278 0.5458306512  
C 6.0 -1.4900023476 -1.5316792730 0.5326247798  
C 6.0 -4.3084574323 -1.5420177164 0.2438985351  
C 6.0 -4.9071599629 -2.6020971768 0.1238699161  
C 6.0 -5.5694223157 -3.7741767415 -0.0047317806  
C 6.0 -6.1683173838 -4.8342865976 -0.1225031134  
C 6.0 5.1315288656 -1.5229450283 1.2329274505  
C 6.0 4.5518359931 -2.5924264889 1.1164230287  
C 6.0 3.8877312765 -3.7680472019 0.9855132013  
C 6.0 3.2710951239 -4.8163488963 0.8662171569  
C 6.0 -5.7381568208 0.9038130304 0.2119400241  
C 6.0 -8.2999084902 0.8946964088 -0.0558765273  
C 6.0 -9.5165020987 0.8903837197 -0.1833915340  
C 6.0 -9.1128737810 6.6434898466 0.1576884962  
C 6.0 -9.7295046875 5.5951903330 0.0383462233  
C 6.0 -10.3936047040 4.4195718300 -0.0926072969  
C 6.0 -10.9732944709 3.3500919002 -0.2091411806  
C 6.0 -0.9584530099 -7.2961318219 0.2948256379  
C 6.0 -2.1734939024 -7.3217683137 0.1666587845  
C 6.0 -3.5226890975 -7.3265686452 0.0255699170  
C 6.0 -4.7381067627 -7.3095769537 -0.1004431889  
C 6.0 -6.9550834369 0.8993827383 0.0866821459  
C 6.0 -9.0112247234 -4.8598136036 -0.4229638407  
C 6.0 -9.6463445484 -3.8158578492 -0.4366510269  
C 6.0 -10.3311842579 -2.6449197675 -0.4491286552  
C 6.0 -10.9297416431 -1.5795278687 -0.4578991179

**Gr2:**

C 6.0 -2.2240741960 2.1478985302 0.6554256856  
C 6.0 -3.6394840079 2.1435941110 0.4928361356  
C 6.0 -4.3384427059 0.9082166450 0.3697865375  
C 6.0 -3.6177026546 -0.3207563405 0.3684582901  
C 6.0 -2.2022924461 -0.3164517628 0.5310442865  
C 6.0 -1.5033340786 0.9189255826 0.6540971584  
C 6.0 1.0167166942 7.8831470838 1.2819353880  
C 6.0 -6.9814271173 7.8547568055 0.4441886167  
C 6.0 -10.9185118180 0.8854237179 -0.3305509805  
C 6.0 -6.8584962671 -6.0560054909 -0.2580316266  
C 6.0 1.1396454246 -6.0276168705 0.5797440584  
C 6.0 5.0767387098 0.9417198583 1.3543997386  
C 6.0 2.4370383308 7.8993736426 1.4319308159  
C 6.0 3.1056745664 9.1295174093 1.5653279517  
C 6.0 2.3983990637 10.3288532896 1.5526249263  
C 6.0 1.0135866629 10.3289102921 1.4073644344  
C 6.0 0.3051834797 9.1215642933 1.2709692646  
C 6.0 -6.2918281919 9.0981244768 0.5804484352  
C 6.0 -7.0215317630 10.3003889183 0.5657373489  
C 6.0 -8.4062604702 10.2905446493 0.4200135689  
C 6.0 -9.0922929139 9.0863032332 0.2859660435  
C 6.0 -8.4019505556 7.8609615122 0.2953597388  
C 6.0 -11.6492600632 2.1125749874 -0.3441398074  
C 6.0 -13.0476039615 2.0847037409 -0.4923964958  
C 6.0 -13.7250325587 0.8755247279 -0.6257499981  
C 6.0 -13.0262824453 -0.3288092545 -0.6141731754  
C 6.0 -11.6275328216 -0.3468140132 -0.4682348645

|   |     |                |               |               |
|---|-----|----------------|---------------|---------------|
| C | 6.0 | -8.2788200037  | -6.0722337826 | -0.4080071676 |
| C | 6.0 | -8.9474529406  | -7.3023766030 | -0.5414297316 |
| C | 6.0 | -8.2401714443  | -8.5017095084 | -0.5287776357 |
| C | 6.0 | -6.8553568713  | -8.5017647292 | -0.3835379530 |
| C | 6.0 | -6.1469576129  | -7.2944199778 | -0.2471114237 |
| C | 6.0 | 0.4500402797   | -7.2709873251 | 0.4435413700  |
| C | 6.0 | 1.1797335827   | -8.4732567886 | 0.4583480115  |
| C | 6.0 | 2.5644582884   | -8.4634147860 | 0.6041098232  |
| C | 6.0 | 3.2504973758   | -7.2591703561 | 0.7380963798  |
| C | 6.0 | 2.5601652811   | -6.0338235905 | 0.7286069577  |
| C | 6.0 | 5.8074948182   | -0.2854275089 | 1.3679186391  |
| C | 6.0 | 7.2058446041   | -0.2575528011 | 1.5161193063  |
| C | 6.0 | 7.8832705810   | 0.9516254658  | 1.6494928729  |
| C | 6.0 | 7.1845120740   | 2.1559552809  | 1.6379910773  |
| C | 6.0 | 5.7857571965   | 2.1739568682  | 1.4921029103  |
| H | 1.0 | 4.1847811194   | 9.1262988470  | 1.6784719333  |
| H | 1.0 | 2.9300528226   | 11.2699297872 | 1.6567838543  |
| H | 1.0 | 0.4597234516   | 11.2618714276 | 1.3972111255  |
| H | 1.0 | -6.4841953430  | 11.2372032609 | 0.6702928413  |
| H | 1.0 | -8.9545192748  | 11.2278047055 | 0.4107185947  |
| H | 1.0 | -10.1712783973 | 9.0754703385  | 0.1721416491  |
| H | 1.0 | -13.5893854166 | 3.0247482613  | -0.5009391275 |
| H | 1.0 | -14.8049451959 | 0.8717165154  | -0.7393441196 |
| H | 1.0 | -13.5514212866 | -1.2726204452 | -0.7177716246 |
| H | 1.0 | -10.0265615075 | -7.2991596566 | -0.6545547164 |
| H | 1.0 | -8.7718222979  | -9.4427851165 | -0.6329593922 |
| H | 1.0 | -6.3014890083  | -9.4347235285 | -0.3734236264 |
| H | 1.0 | 0.6423923976   | -9.4100732261 | 0.3538359156  |

|   |     |               |               |              |
|---|-----|---------------|---------------|--------------|
| H | 1.0 | 3.1127088707  | -9.4006788832 | 0.6134806452 |
| H | 1.0 | 4.3294802019  | -7.2483388860 | 0.8519461097 |
| H | 1.0 | 7.7476326086  | -1.1975940599 | 1.5246043532 |
| H | 1.0 | 8.9631876389  | 0.9554363546  | 1.7630448709 |
| H | 1.0 | 7.7096484953  | 3.0997657339  | 1.7416084151 |
| C | 6.0 | -1.1036677144 | 9.1367216689  | 1.1243043624 |
| C | 6.0 | -2.3190876656 | 9.1537129438  | 0.9983133079 |
| C | 6.0 | -3.6682861905 | 9.1489110084  | 0.8572562481 |
| C | 6.0 | -4.8833305456 | 9.1232713583  | 0.7291227476 |
| C | 6.0 | -4.3517729862 | 3.3588222587  | 0.4912446707 |
| C | 6.0 | -4.9691707605 | 4.4148836471  | 0.4780302478 |
| C | 6.0 | -5.6521029296 | 5.5820998356  | 0.4675167575 |
| C | 6.0 | -6.2696931457 | 6.6379602682  | 0.4565774154 |
| C | 6.0 | 0.3265361645  | 6.6614279369  | 1.1464175980 |
| C | 6.0 | -0.2723591027 | 5.6013185415  | 1.0286431051 |
| C | 6.0 | -0.9346200869 | 4.4292391824  | 0.9000324837 |
| C | 6.0 | -1.5333203433 | 3.3691595770  | 0.7799937718 |
| C | 6.0 | 5.0879600101  | 3.4066677348  | 1.4818199217 |
| C | 6.0 | 4.4893997169  | 4.4720581811  | 1.4730722167 |
| C | 6.0 | 3.8045586711  | 5.6429955784  | 1.4606062274 |
| C | 6.0 | 3.1694394816  | 6.6869516871  | 1.4469164630 |
| C | 6.0 | 3.6747258031  | 0.9367577457  | 1.2072706452 |
| C | 6.0 | 2.4581312128  | 0.9324438003  | 1.0797650105 |
| C | 6.0 | 1.1133058591  | 0.9277576997  | 0.9372090650 |
| C | 6.0 | -0.1036204491 | 0.9233289366  | 0.8119481131 |
| C | 6.0 | 0.4279173381  | -4.8108174703 | 0.5673009071 |
| C | 6.0 | -0.1896698797 | -3.7549554324 | 0.5563473329 |
| C | 6.0 | -0.8726019437 | -2.5877392278 | 0.5458306512 |

C 6.0 -1.4900023476 -1.5316792730 0.5326247798  
C 6.0 -4.3084574323 -1.5420177164 0.2438985351  
C 6.0 -4.9071599629 -2.6020971768 0.1238699161  
C 6.0 -5.5694223157 -3.7741767415 -0.0047317806  
C 6.0 -6.1683173838 -4.8342865976 -0.1225031134  
C 6.0 5.1315288656 -1.5229450283 1.2329274505  
C 6.0 4.5518359931 -2.5924264889 1.1164230287  
C 6.0 3.8877312765 -3.7680472019 0.9855132013  
C 6.0 3.2710951239 -4.8163488963 0.8662171569  
C 6.0 -5.7381568208 0.9038130304 0.2119400241  
C 6.0 -8.2999084902 0.8946964088 -0.0558765273  
C 6.0 -9.5165020987 0.8903837197 -0.1833915340  
C 6.0 -9.1128737810 6.6434898466 0.1576884962  
C 6.0 -9.7295046875 5.5951903330 0.0383462233  
C 6.0 -10.3936047040 4.4195718300 -0.0926072969  
C 6.0 -10.9732944709 3.3500919002 -0.2091411806  
C 6.0 -0.9584530099 -7.2961318219 0.2948256379  
C 6.0 -2.1734939024 -7.3217683137 0.1666587845  
C 6.0 -3.5226890975 -7.3265686452 0.0255699170  
C 6.0 -4.7381067627 -7.3095769537 -0.1004431889  
C 6.0 -6.9550834369 0.8993827383 0.0866821459  
C 6.0 -9.0112247234 -4.8598136036 -0.4229638407  
C 6.0 -9.6463445484 -3.8158578492 -0.4366510269  
C 6.0 -10.3311842579 -2.6449197675 -0.4491286552  
C 6.0 -10.9297416431 -1.5795278687 -0.4578991179
